# Supplementary material for: Smoking and risk of colonic diverticulosis: A meta-analysis
Source: PubMed Central journal article supplement — J Postgrad Med. 2018 Jan-Mar;64(1):35–9. doi: 10.4103/jpgm.JPGM_319_17 (PMC5820812; doi:10.4103/jpgm.jpgm_319_17), 2018
Supplement: JPGM-64-35_Suppl1.pdf [file JPGM-64-35_Suppl1.pdf]

## **Online Supplementary Data**

### **Search Strategy**

#### **Database: Ovid MEDLINE**

1. Smoking.mp. or exp smoking/
2. Tobacco.mp. or exp tobacco/
3. Cigarette.mp. or exp Tobacco Products/
4. Or/1-3
5. Diverticulosis.mp. or exp Diverticulum/
6. Diverticular.mp.
7. Exp Diverticulosis, Colonic/
8. Or/5-7
9. 4 and 8

#### **Database: EMBASE**

1. Smoking.mp. or exp smoking/
2. Exp smoking and smoking related phenomena/
3. Tobacco.mp. or exp tobacco/
4. Or/1-3
5. Diverticulosis.mp. or exp diverticulosis /
6. Diverticular.mp.
7. Colon diverticulosis.mp. or exp colon diverticulosis/
8. Or/5-7
9. 4 and 8
